# Supplementary material for: Protease-Based Subunit Vaccine in Mice Boosts BCG Protection against Mycobacterium tuberculosis
Source: MDPI journal article supplement (doi:10.3390/vaccines10020306), 2022-02-16
Supplement: s1 [file s1]

## Vaccines

### A protease-based subunit vaccine in mice boosts BCG protection against *Mycobacterium tuberculosis*

Ana Paula Junqueira-Kipnis<sup>1</sup>; Carine de Castro Souza<sup>1</sup>; Ana Carolina de Oliveira Carvalho<sup>1</sup>;  
Fabio Muniz de Oliveira<sup>1</sup>; Vinnycius Pereira Almeida; Alisson Rodrigues; Mara Rúbia Celes<sup>1</sup>;  
André Kipnis<sup>1\*</sup>

**Supplementary Table S1.** List of HLA I and HLA II used for the analysis of binding epitopes.

| HLA I                                                                                                                                                                                                                                                                                                                                                         | HLA II                                                                                                                                                                                                                                                                                                                                                                                                                                                                                                                                                                          |
|---------------------------------------------------------------------------------------------------------------------------------------------------------------------------------------------------------------------------------------------------------------------------------------------------------------------------------------------------------------|---------------------------------------------------------------------------------------------------------------------------------------------------------------------------------------------------------------------------------------------------------------------------------------------------------------------------------------------------------------------------------------------------------------------------------------------------------------------------------------------------------------------------------------------------------------------------------|
| HLA-A*01:01, HLA-A*02:01, HLA-A*02:03, HLA-A*02:06, HLA-A*03:01, HLA-A*11:01, HLA-A*23:01, HLA-A*24:02, HLA-A*26:01, HLA-A*30:01, HLA-A*30:02, HLA-A*31:01, HLA-A*32:01, HLA-A*33:01, HLA-A*68:01, HLA-A*68:02, HLA-B*07:02, HLA-B*08:01, HLA-B*15:01, HLA-B*35:01, HLA-B*40:01, HLA-B*44:02, HLA-B*44:03, HLA-B*51:01, HLA-B*53:01, HLA-B*57:01, HLA-B*58:01 | HLA-DRB1*01:01, HLA-DRB1*03:01, HLA-DRB1*04:01, HLA-DRB1*04:05, HLA-DRB1*07:01, HLA-DRB1*08:02, HLA-DRB1*09:01, HLA-DRB1*11:01, HLA-DRB1*12:01, HLA-DRB1*13:02, HLA-DRB1*15:01, HLA-DRB3*01:01, HLA-DRB3*02:02, HLA-DRB4*01:01, HLA-DRB5*01:01, HLA-DQA1*05:01/DQB1*02:01, HLA-DQA1*05:01/DQB1*03:01, HLA-DQA1*03:01/DQB1*03:02, HLA-DQA1*04:01/DQB1*04:02, HLA-DQA1*01:01/DQB1*05:01, HLA-DQA1*01:02/DQB1*06:02, HLA-DPA1*02:01/DPB1*01:01, HLA-DPA1*01:03/DPB1*02:01, HLA-DPA1*01/DPB1*04:01, HLA-DPA1*03:01/DPB1*04:02, HLA-DPA1*02:01/DPB1*05:01, HLA-DPA1*02:01/DPB1*14:01 |
